# Supplementary material for: Suppression of hesA mutation on nitrogenase activity in Paenibacillus polymyxa WLY78 with the addition of high levels of molybdate or cystine
Source: PeerJ. 2019 Feb 1;7:e6294. doi: 10.7717/peerj.6294 (PMC6361004; doi:10.7717/peerj.6294)
Supplement: Supplemental Information 5 [file peerj-07-6294-s005.xlsx]

## Sheet: Nitrogenase activity
Concentrations of MoO42-	ΔhesA		ΔhesA (pHY300PLK-hesA)		ΔhesA (pHY300PLK-nifQ)		Paenibacillus polymyxa WLY78
0 nM MoO42-	26.42		1425.13		58.65		1099.87
	25.09		1307.44		57.56		1072.76
	27.77		1425.38		58.06		1146.59
	26.4267	1.34001	1385.98	68.0206	58.09	0.545619	1106.41	37.3465
3×101 nM MoO42-	53.86						1871.23
	52.17						2131.28
	53.61						3157.98
	53.2133	0.912159					2386.83	680.375
3×102 nM MoO42-	84		3544.17		113.18		3452.23
	56.37		3310.4		117.26		3253.22
	65.19		3227.7		197.72		3177.76
	68.52	14.1128	3360.76	164.135	142.72	47.6751	3294.4	141.794
3×103 nM MoO42-	98.79						2999.1
	127.02						3143.27
	100.13						3598.7
	108.647	15.9259					3247.02	312.975
3×104 nM MoO42-	139.94		2901.46		251.57		3149.78
	162.21		3039.68		259.19		2821.65
	202.79		3589.88		245.38		3121.52
	168.313	31.8664	3177.01	364.176	252.047	6.91733	3030.98	181.838
3×105 nM MoO42-	289.93						3116.87
	147.85						3641.09
	170.9						2935.44
	202.893	76.252					3231.13	366.439
3×106 nM MoO42-	454.79						2796.35
	460.4						2871.27
	437.18						2868.26
	450.79	12.1158					2845.29	42.4129
3×107 nM MoO42-	704.55						2871.74
	659.2						2936.52
	683.02						2723.6
	682.257	22.6846					2843.95	109.146
3×108 nM MoO42-	182.06						258.03
	207.07						228.4
	210.28						233.81
	199.803	15.4498					240.08	15.7787
