# Supplementary material for: Suppression of hesA mutation on nitrogenase activity in Paenibacillus polymyxa WLY78 with the addition of high levels of molybdate or cystine
Source: PeerJ. 2019 Feb 1;7:e6294. doi: 10.7717/peerj.6294 (PMC6361004; doi:10.7717/peerj.6294)
Supplement: Supplemental Information 10 [file peerj-07-6294-s010.xlsx]

## Sheet: Nitrogenase activity
Concentrations of cystine（mM）	D-O		E. coli 78-7		D-O (pBluescript II SK(+)-hesA)
0	36.3		40.91		53.27
	39.42		33.93		57.39
	44.05		34.38		54.62
	39.9233	3.89944	36.4067	3.90649	55.0933	2.10039
0.2	223.17		294.09		196.62
	266.03		278.4		153.04
	267.84		227.94		149.85
	252.347	25.2839	266.81	34.5645	166.503	26.1305
0.5	154.5		86		77.35
	130.68		93.15		75.9
	170.58		100.86		83.85
	151.92	20.0747	93.3367	7.43176	79.0333	4.23389
1	72.45		51.36		23.59
	74.1		45.28		21.5
	70.52		40.29		27.66
	72.3567	1.79182	45.6433	5.54394	24.25	3.13259
2	43.27		11.79		0
	51.69		9.53		0
	43.92		10.23		0
	46.2933	4.68494	10.5167	1.15695	0	0
