# Supplementary material for: Suppression of hesA mutation on nitrogenase activity in Paenibacillus polymyxa WLY78 with the addition of high levels of molybdate or cystine
Source: PeerJ. 2019 Feb 1;7:e6294. doi: 10.7717/peerj.6294 (PMC6361004; doi:10.7717/peerj.6294)
Supplement: Supplemental Information 11 [file peerj-07-6294-s011.xlsx]

## Sheet: Nitrate reductase
	OD540nm	Nitrite concentration (mM)	OD595nm	Proterin concentration (mg/ml)	Total protein (mg)	nitrate reductase (nmol nitrite·min-1·mg-1)	Average	Stdev
ΔhesA	0.411	0.446644	0.115	0.286914	0.0573829	1037.81
	0.457	0.498098	0.123	0.307281	0.0614562	1080.66
	0.529	0.578635	0.15	0.376018	0.0752037	1025.9	1048.12	28.7988
P. polymyxa WLY78	0.46	0.501454	0.127	0.317464	0.0634929	1053.04
	0.472	0.514877	0.129	0.322556	0.0645112	1064.16
	0.468	0.510403	0.129	0.322556	0.0645112	1054.91	1057.37	5.95369

## Sheet: Standard curve of nitrite
NO2-(mM)	OD540nm
0	0
0.2	0.195
0.4	0.375
0.6	0.564
0.8	0.718
1	0.9

## Sheet: Standard curve of protein
Proterin concentration (mg/ml)	OD595nm
0	0
0.1	0.055
0.2	0.076
0.4	0.154
0.6	0.232
0.8	0.316
1	0.401
